# Supplementary material for: Investigation into the Effects of Different Restoration Techniques on the Soil Nutrient Status in Degraded Stipa grandis Grassland
Source: MDPI journal article supplement (doi:10.3390/agronomy14010057), 2023-12-25
Supplement: s1 [file s1]

### Supplementary materials: Research area species information overview

The study sample is located in the transition zone from meadow steppe to typical steppe, in which *Stipa grandis* was the establishment species and dominant species, and *Leymus chinensis* was the subdominant species. The soil type is chestnut soil and the climate is dry. When the rainfall is high, the preponderance of *Stipa baicalensis* will increase, but it is not a group species, and the population of *Leymus chinensis* will increase to a certain extent after the grassland improvement.

**Table S1:** Plant community species composition under different grassland restoration measures in the study area

| Vegetation<br>classification | Name                            | Description                    | Emergence of<br>species |    |   |   |
|------------------------------|---------------------------------|--------------------------------|-------------------------|----|---|---|
|                              |                                 |                                | CK                      | RP | F | E |
| Poaceae<br>(Gramineae)       | <i>Stipa grandis</i>            | Dominant species/group species | √                       | √  | √ | √ |
|                              | <i>Leymus chinensis</i>         | Subdominant species            | √                       | √  | √ | √ |
|                              | <i>Stipa baicalensis</i>        |                                | √                       | √  | √ | √ |
|                              | <i>Agropyron cristatum</i>      |                                | √                       | √  | √ | √ |
|                              | <i>Cleistogenes squarrosa</i>   |                                | √                       | √  | √ | √ |
|                              | <i>Poa pratensis</i>            |                                | √                       | √  | √ | √ |
|                              | <i>Koeleria macrantha</i>       |                                | √                       |    | √ |   |
| Fabaceae                     | <i>Melilotus dentatus</i>       |                                |                         | √  | √ |   |
|                              | <i>Caragana microphylla</i>     |                                |                         |    | √ |   |
| Asteraceae<br>(Compositae)   | <i>Klasea centauroides</i>      |                                | √                       |    | √ | √ |
|                              | <i>Artemisia oxycephala</i>     |                                |                         |    | √ |   |
|                              | <i>Carpesium abrotanoides</i>   |                                |                         | √  |   | √ |
|                              | <i>Artemisia scoparia</i>       |                                | √                       | √  | √ | √ |
|                              | <i>Ixeris polycephala</i>       |                                |                         | √  |   | √ |
|                              | <i>Artemisia frigida</i>        |                                | √                       | √  |   | √ |
| Forb                         | <i>Allium anisopodium</i>       |                                |                         | √  |   |   |
|                              | <i>Plantago depressa</i>        |                                |                         | √  |   |   |
|                              | <i>Chenopodium aristatum</i>    |                                |                         |    |   | √ |
|                              | <i>Carex duriuscula</i>         |                                | √                       |    |   | √ |
|                              | <i>Cymbaria dahurica</i>        |                                | √                       | √  |   |   |
|                              | <i>Potentilla bifurca</i>       |                                | √                       | √  | √ |   |
|                              | <i>Dontostemon dentatus</i>     |                                |                         | √  |   |   |
|                              | <i>Carex korshinskyi</i>        |                                | √                       | √  | √ | √ |
|                              | <i>Chenopodium glaucum</i>      |                                |                         |    |   | √ |
|                              | <i>Chenopodium acuminatum</i>   |                                |                         |    |   | √ |
|                              | <i>Potentilla tanacetifolia</i> |                                | √                       | √  | √ | √ |
|                              | <i>Phlomis tuberosa</i>         |                                | √                       |    |   |   |
|                              | <i>Linaria vulgaris</i>         |                                |                         |    | √ |   |
|                              | <i>Galium verum</i>             |                                |                         | √  |   |   |

*Allium tenuissimum*

√

*Salsola collina*

√

√

---

CK, RP, F and E in the table represent control group, root cutting treatment, organic fertilizer treatment and enclosure treatment respectively.
